# Supplementary material
Source: publisher figshare collection journal article supplement (https://frontiersin.figshare.com/ndownloader/files/32420120)
Supplement: Supplementary file 1 [file 32420120]

Annex 2

Unified questionnaire for stakeholders

1. Please provide the precise periods of school lockdowns during the pandemic in the period from March 2020 - March 2021
2. Have you been obligatedto provide/prepare school meals for the pupils during the period from March 2020 - March 2021?

- Yes, all the time
- Yes, during specific periods (name the period(s): ……)
- Yes, but only for specific group/s of pupils (please specify: … )
- No, there was no official obligation (by law/local authorities etc.)

1. Have you provided/prepared school meals for the pupils during the period from March 2020 - March 2021?

- Yes, all the time
- Yes, during specific periods (name the period(s): ……)
- Yes, but only for specific group/s of pupils (please specify: … )
- No, meals were not provided/prepared

1. During school lockdowns, has the provision of school meals continued?

- Yes, as normal
- Yes, as a takeaway
- Yes, as a shopping bag of food products for students
- No, the provision was suspended

1. From the list below, what options have you implemented during the pandemic? (multi-answer):

- Different dining serving times
- Dining in smaller groups
- Takeaway to home
- Delivery to home
- Advance announcements of enrolment for meals
- Modified menus
- Other: ……...

1. What were the biggest challenges you faced in relation to the COVID-19 pandemic while providing school meals?

- Uncertainty over school opening times
- Challenges connected to a lack of adequate numbers of personnel because of lockdowns/sickness
- Uncertainty over the number of pupils present and challenges connected to calculating the precise amount of food to be served
- Fear of contamination/infection
- Increased amounts of food waste
- Shortage of staff
- Lack of clear guidance from the national authorities
- Lack of adequate guidelines
- COVID-19 hygienic practices in the kitchen and dining rooms
- Maintaining adequate physical distancing during work or providing suitable personal protective equipment
- Challenges with food supply/shopping
- Disposable utensils
- Serving meals in shifts
- Obligation to prepare and distribute food packages during distance learning
- Other: ……...

1. Have you faced staff-related issues?

- Yes, short-term staff lay-offs
- Yes, long-term staff lay-offs
- Yes, shifting to a different operating mode
- Yes, lower occupational well-being
- Yes, other: …..
- No

1. (if applicable) As a professional, have you been worried how the change in the provision of school meals will influence pupils’ health/nutrition?

- Yes, a lot
- Yes, to some extend
- No

1. Have you faced:

- Additional food waste during the COVID-19 pandemic?
- Reduction of food waste during the COVID-19 pandemic?
- Additional costs e.g. due to packaging?
- Technical/operational issues?
- A need to modify menus?
- Other: ……...
